# Supplementary material for: High-performance perovskite solar cells resulting from large perovskite grain size enabled by the urea additive
Source: Royal Society of Chemistry journal article supplement (doi:10.1039/d2se00104g), 2022-01-01
Supplement: d2se00104g1.pdf [file d2se00104g1.pdf]

## Electronic Supplementary Information

### **High-performance Perovskite Solar Cells from Large Perovskite Grain Size by the Urea Additive**

Qingbin Cai<sup>1</sup>, Chao Liang<sup>2</sup>, Zhichao Lin<sup>1</sup>, Wenqi Zhang<sup>1</sup>, Guibin Shen<sup>1</sup>, Hongye Dong<sup>1</sup>, Xiangning Xu<sup>1</sup>, Haoyi Wang<sup>1\*</sup>, Cheng Mu<sup>1\*</sup> and Guichuan Xing<sup>3</sup>

1 Key Laboratory of Advanced Light Conversion Materials and Biophotonics, Department of Chemistry Renmin University of China, Beijing, 100872, P. R. China.

2 MOE Key Laboratory for Nonequilibrium Synthesis and Modulation of Condensed Matter, School of Physics, Xi'an Jiaotong University, Xi'an 710049, P. R. China.

3 Joint Key Laboratory of the Ministry of Education, Institute of Applied Physics and Materials Engineering, University of Macau, Avenida da Universidade, Taipa, Macau 999078, P. R. China.

**Table S-1.** The fitted parameters of TRPL spectra (excitation at 475 nm) of perovskite films with additive different concentrations of urea deposited on quartz glass.

| Sample | $\tau_{ave}$ (ns) | $A_1$ (%) | $\tau_1$ (ns) | $A_2$ (%) | $\tau_2$ (ns) |
|--------|-------------------|-----------|---------------|-----------|---------------|
| 0M     | 326.6             | 43.6      | 173.3         | 56.4      | 386.7         |
| 0.1M   | 944.0             | 22.5      | 262.4         | 77.5      | 996.1         |
| 0.2M   | 1687.0            | 4.6       | 335.6         | 95.4      | 1699.9        |
| 0.3M   | 583.2             | 25.6      | 213.8         | 74.4      | 626.6         |

**Table S2.** Calculated parameters and trap density (Nt) of the perovskite films without urea and with 0.2 M urea.

|      | $L$ (nm) | $\epsilon$ | $V_{TFL}$ (V) | $Nt$ ( $\times 10^{15} \text{cm}^{-3}$ ) |
|------|----------|------------|---------------|------------------------------------------|
| 0M   | 710      | 42.3       | 0.41          | 3.8                                      |
| 0.2M | 710      | 42.3       | 0.25          | 2.3                                      |

**Table S3.** Photovoltaic parameters of PSCs devices with additive different concentrations of urea

|      | $J_{sc}$ ( $\text{mA}/\text{cm}^2$ ) | $V_{oc}$ (V)      | FF (%)          | PCE (%)         |
|------|--------------------------------------|-------------------|-----------------|-----------------|
| 0M   | 23.99 $\pm$ 0.04                     | 1.098 $\pm$ 0.005 | 72.6 $\pm$ 0.27 | 19.12 $\pm$ 0.4 |
| 0.1M | 24.42 $\pm$ 0.03                     | 1.136 $\pm$ 0.007 | 75.2 $\pm$ 0.25 | 20.86 $\pm$ 0.4 |
| 0.2M | 24.58 $\pm$ 0.02                     | 1.142 $\pm$ 0.005 | 78.8 $\pm$ 0.23 | 22.12 $\pm$ 0.3 |
| 0.3M | 24.06 $\pm$ 0.04                     | 1.118 $\pm$ 0.006 | 72.7 $\pm$ 0.22 | 19.56 $\pm$ 0.3 |

**Table S4.** The photovoltaic parameters and hysteresis indexes for PSC without and with 0.2

M urea doping, the hysteresis index is defined as  $(PCE_{\text{reverse}} - PCE_{\text{forward}})/PCE_{\text{reverse}}$ .

|      | Direction | $J_{\text{SC}}$<br>(mA/cm <sup>2</sup> ) | $V_{\text{OC}}$ (V) | FF<br>(%) | PCE (%) | Hysteresis<br>index |
|------|-----------|------------------------------------------|---------------------|-----------|---------|---------------------|
| 0 M  | reverse   | 23.99                                    | 1.098               | 72.6      | 19.12   | 7%                  |
|      | forward   | 23.94                                    | 1.082               | 68.7      | 17.79   |                     |
| 0.2M | reverse   | 24.58                                    | 1.142               | 78.8      | 22.12   | 3.8%                |
|      | forward   | 24.50                                    | 1.136               | 76.5      | 21.29   |                     |

**Table S-5.** The fitted parameters for IS measurements PSCs with additive different concentrations of urea

|      | $R_s(\Omega \text{ cm}^2)$ | $R_{\text{rec}}(\Omega \text{ cm}^2)$ |
|------|----------------------------|---------------------------------------|
| 0M   | 26.1                       | 2481                                  |
| 0.2M | 6.7                        | 5785                                  |

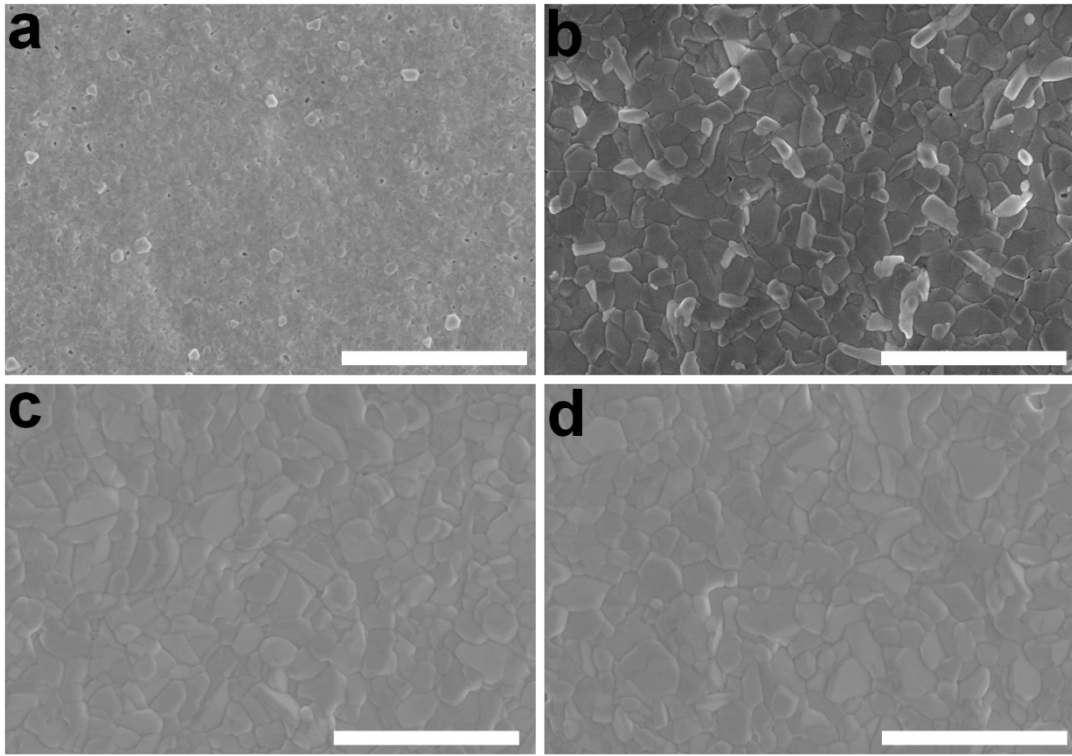

**Fig. S1.** SEM images of  $\text{PbI}_2$  films prepared under different urea concentrations, (a) urea-0 M, (b) urea-0.1M, (c) urea-0.2M, (d) urea-0.3M. The scalebar is 2  $\mu\text{m}$ .

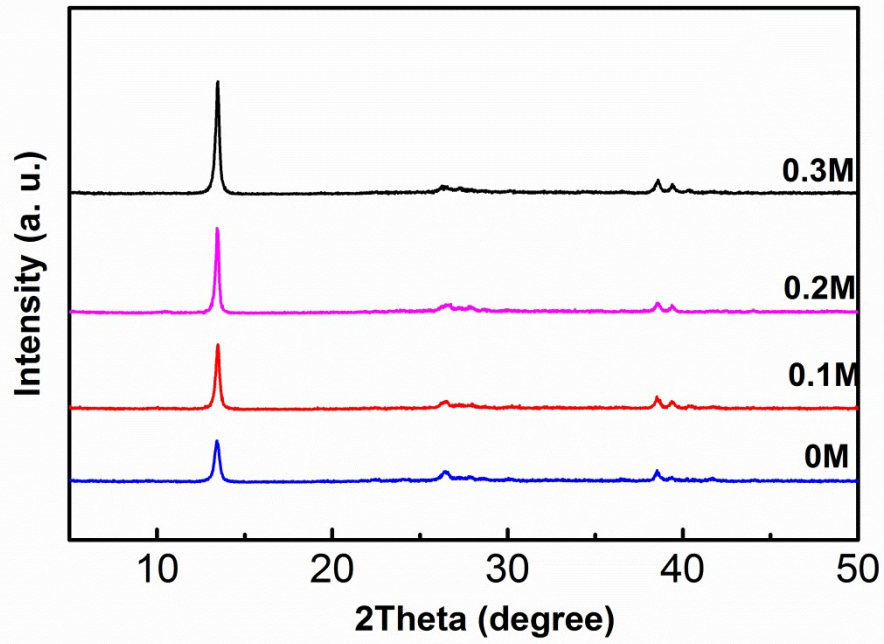

**Fig. S2.** XRD patterns of PbI<sub>2</sub> films with additive with different concentrations of urea. The FWHM of (001) plane is 0.336 °, 0.272 °, 0.253 ° and 0.247 ° as the urea doping concentration increased, respectively.

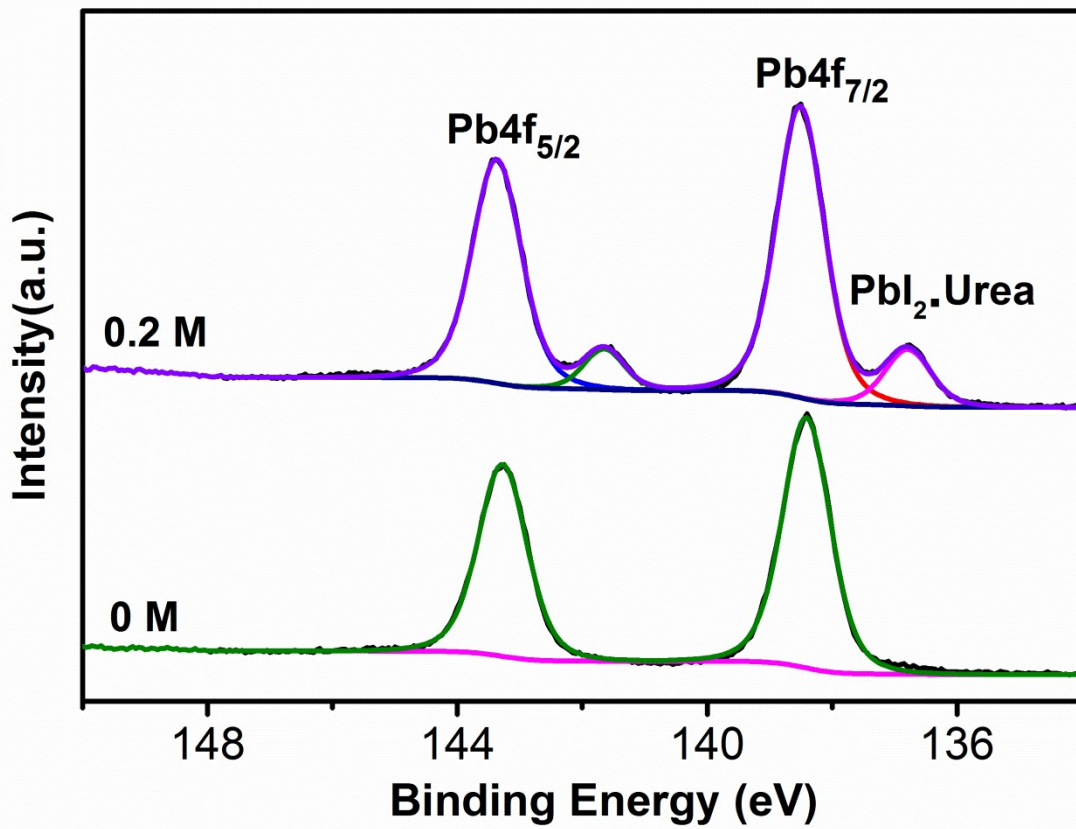

Fig. S3. XPS of PbI<sub>2</sub> films without urea and with 0.2 M urea.

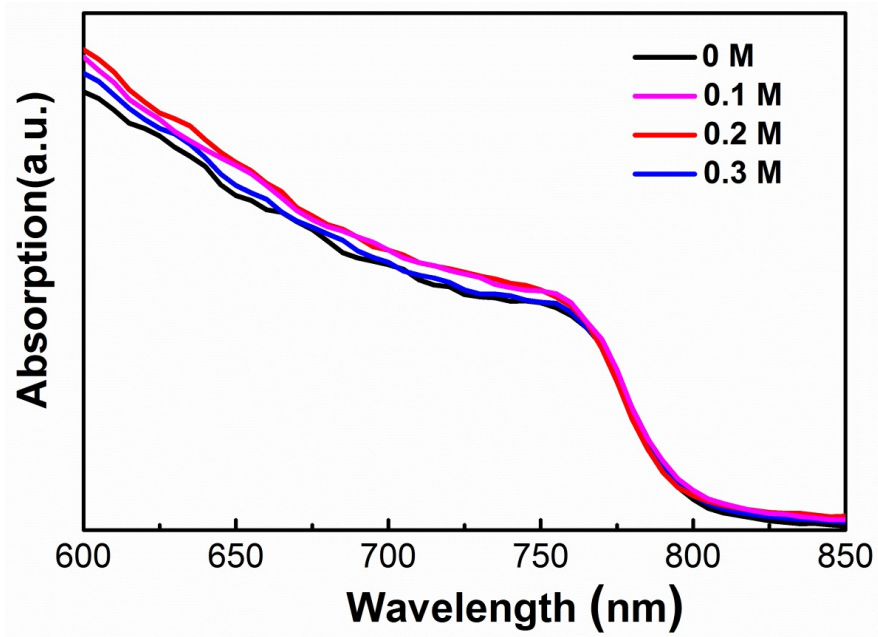

Fig. S4. UV of perovskite films with different concentrations of urea doping.

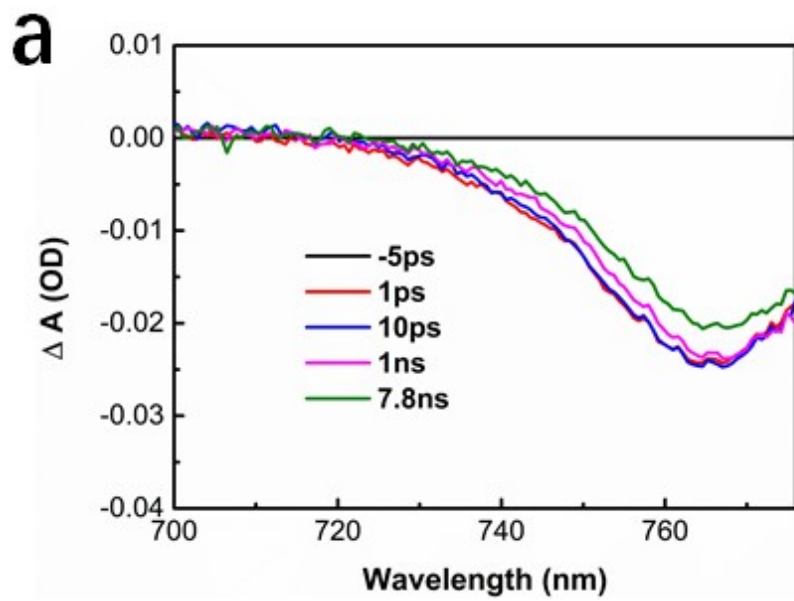

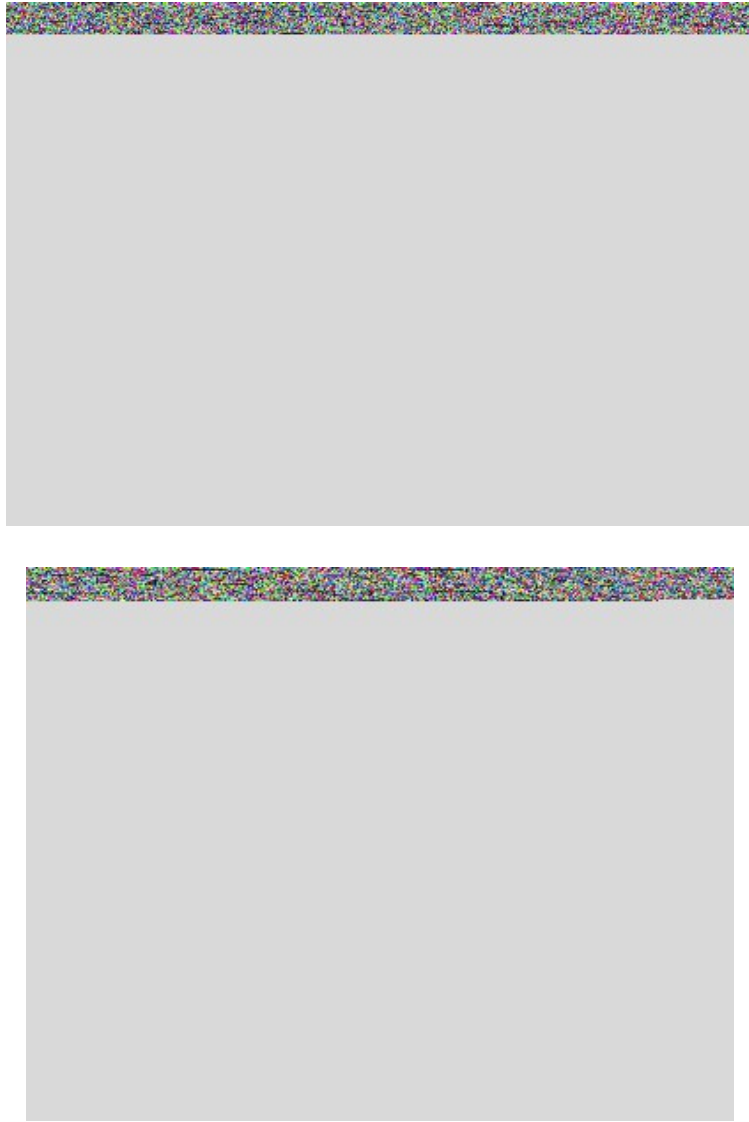

**Fig. S5.** Chimp corrected femtosecond transient absorption (TA) spectroscopy of pristine perovskite (a) and 0.2M urea incorporated (b) perovskite films at selected probe delay times. (c) The corresponding normalized bleaching kinetics at 770 nm for the pristine perovskite and 0.2M urea incorporated perovskite films following excitation at 650 nm ( $\sim 2 \mu\text{J cm}^{-2}$ ).



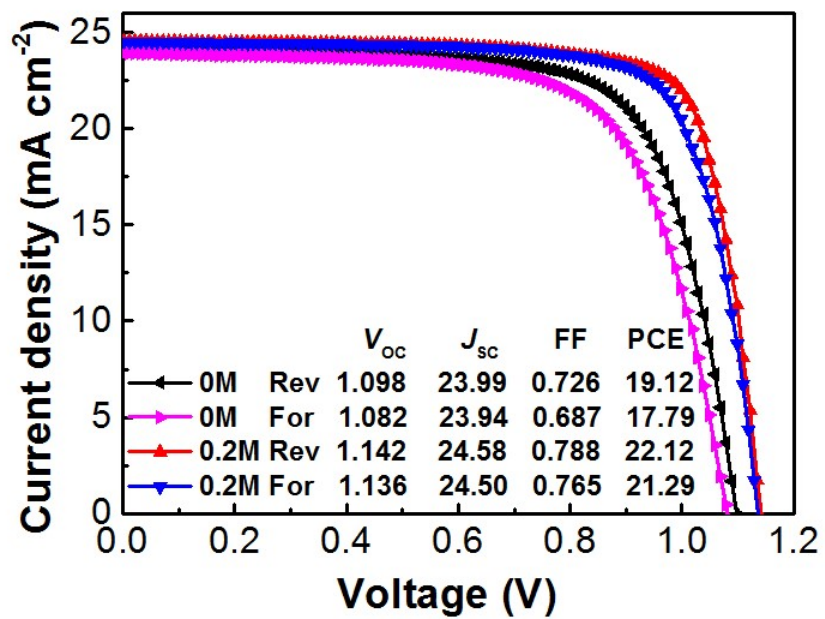

**Fig. S6.** *J-V* curves of PSC without and with 0.2 M urea doping.

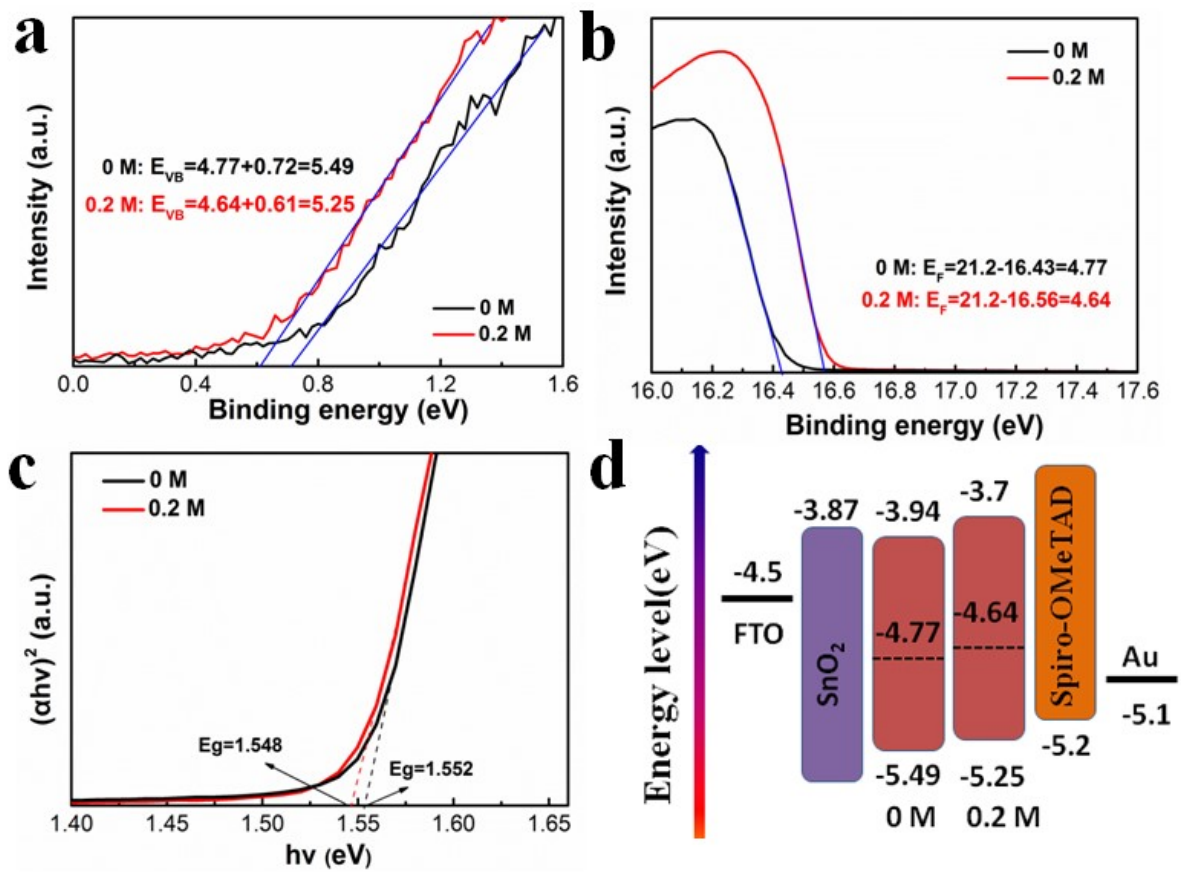

**Fig. S7.** (a) and (b) are UPS spectra of perovskite films without and with 0.2 M urea doping. (c) Tauc plot results of the without and with 0.2 M urea doping perovskites films. (d) Energy level diagram of a typical PSCs.
